# Supplementary material
Source: MDPI journal article supplement (https://www.mdpi.com/2673-7256/3/1/12)
Supplement: s1 [file s1]

# Supporting Information

## Facile Synthesis, Characterization, and Photocatalytic

## Performance of BiOF/BiFeO<sub>3</sub> Hybrid Heterojunction for

## Benzylamine Coupling under Simulated Light Irradiation

**Abdalla S. Abdelhamid <sup>1,2</sup>, Reem H. Alzard <sup>1</sup>, Lamia A. Siddig <sup>1</sup>, Aya Elbahnasy <sup>1</sup>, Duha Aljazmati <sup>1</sup>, Zaina Kadoura <sup>1</sup>, Hind Zeidane <sup>1</sup>, Rufaida Elshikh <sup>1</sup> and Ahmed Alzamly <sup>1,\*</sup>**

<sup>1</sup> Department of Chemistry, United Arab Emirates University, Al-Ain P.O. Box 15551, United Arab Emirates;

<sup>2</sup> Department of Chemical Engineering, United Arab Emirates University, Al-Ain P.O. Box 15551, United Arab Emirates

\* Correspondence: ahmed.alzamly@uaeu.ac.ae

## TABLE OF CONTENTS

|                                                                             |    |
|-----------------------------------------------------------------------------|----|
| Section I: Matched X-ray spectroscopy of the photocatalysts.....            | S3 |
| Section II: Energy-dispersive X-ray spectroscopy of the photocatalysts..... | S5 |
| Section III: NMR spectra .....                                              | S7 |
| Section IV: FTIR spectra .....                                              | S8 |

## Section I: Matched X-ray spectroscopy of the photocatalysts

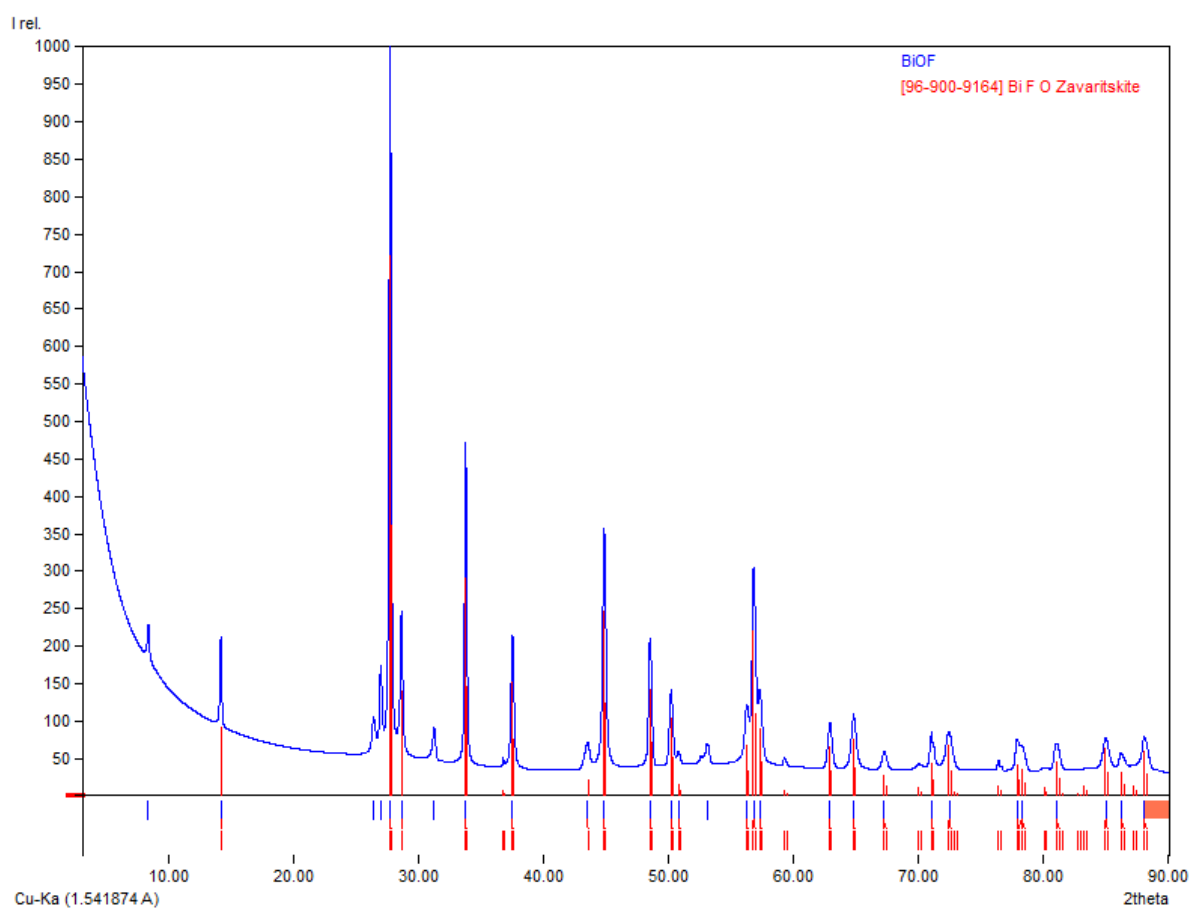

Figure S1. Matched X-ray spectroscopy of the BiOF using Match!3 software (version 3.0).

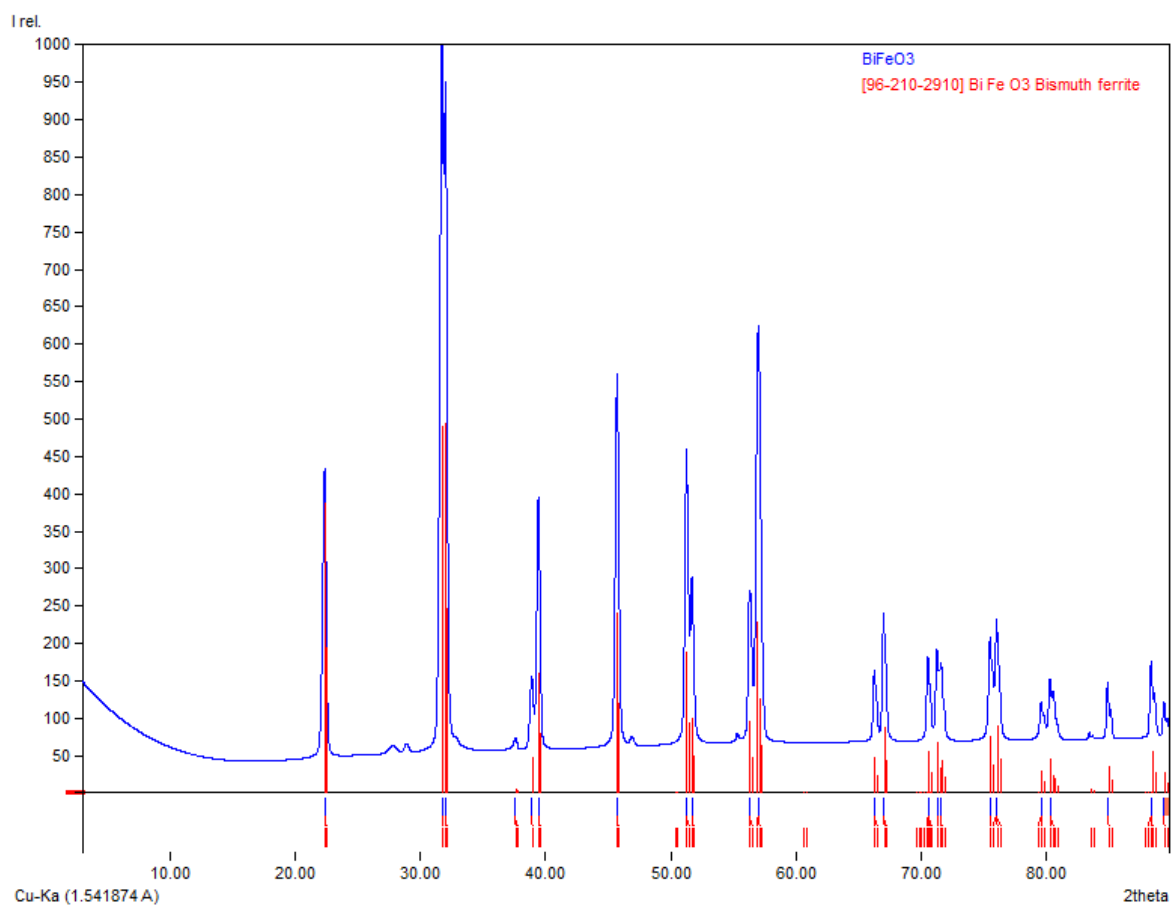

Figure S2. Matched X-ray spectroscopy of the BiFeO<sub>3</sub> using Match!3 software (version 3.0).

## Section II: Energy-dispersive X-ray spectroscopy of the photocatalysts

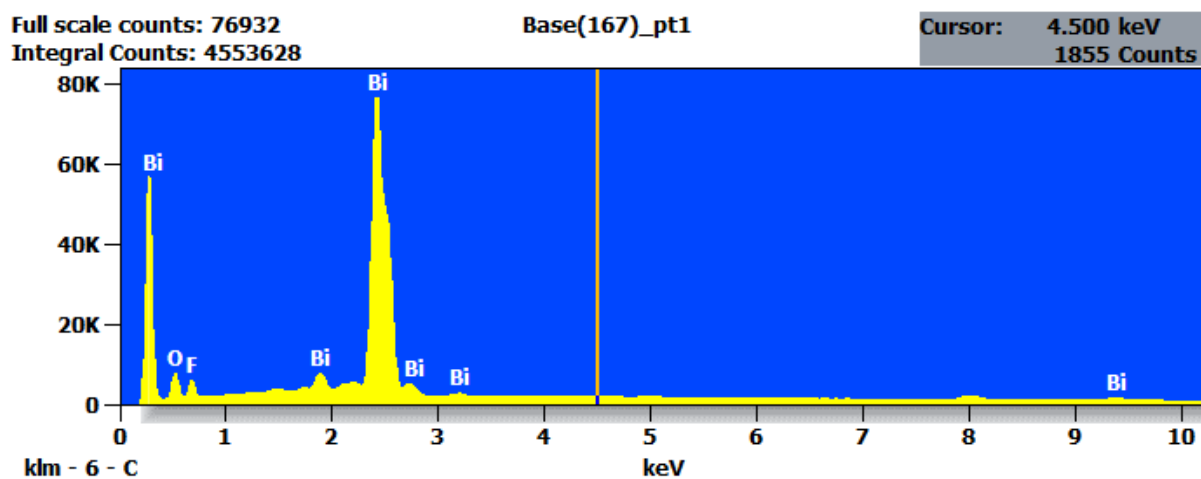

Figure S3. EDX elemental analysis of BiOF.

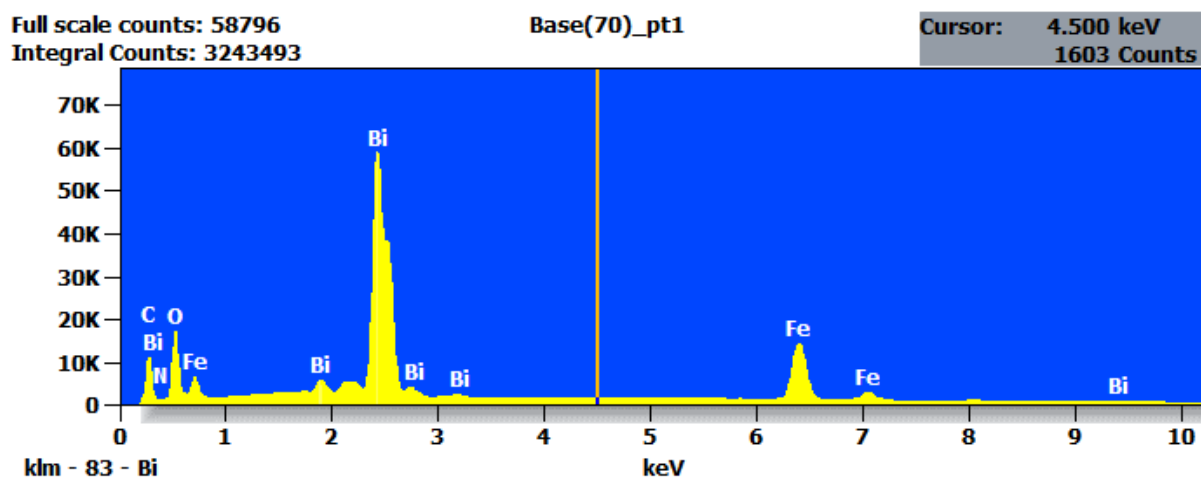

Figure S4. EDX elemental analysis of BiFeO<sub>3</sub>.

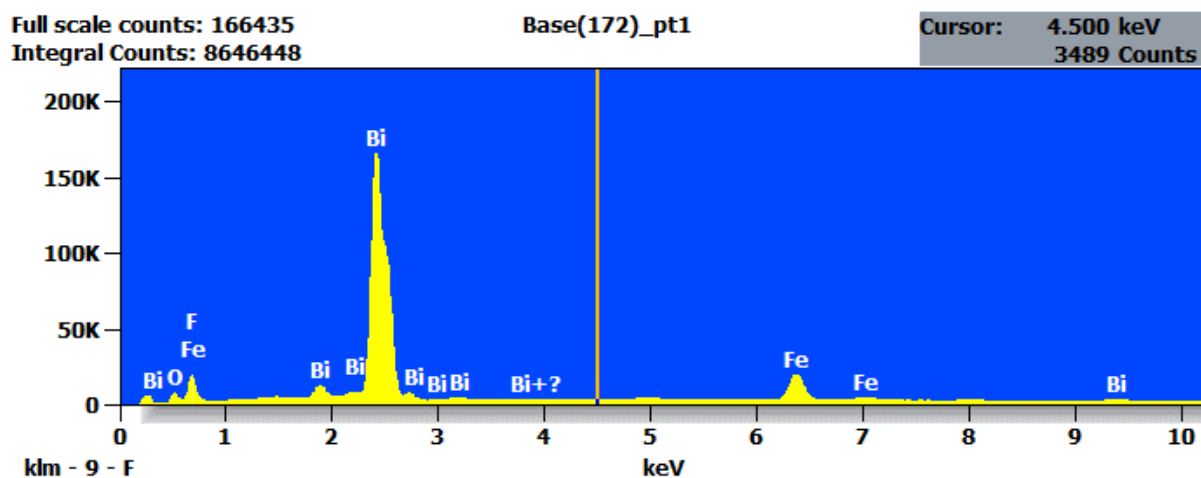

Figure S5. EDX elemental analysis of BiOF/ BiFeO<sub>3</sub> composite.

Table S1. Weight and atomic percentages of BiOF.

|                 | <b>Bismuth</b> | <b>Oxygen</b> | <b>Fluorine</b> |
|-----------------|----------------|---------------|-----------------|
| <b>Weight %</b> | 79.89          | 11.23         | 8.88            |
| <b>Atom %</b>   | 24.64          | 45.25         | 30.11           |

Table S2. Weight and atomic percentages of BiFeO<sub>3</sub>.

|                 | <b>Bismuth</b> | <b>Oxygen</b> | <b>Iron</b> |
|-----------------|----------------|---------------|-------------|
| <b>Weight %</b> | 65.83          | 13.22         | 20.95       |
| <b>Atom %</b>   | 34.19          | 45.26         | 20.55       |

Table S3. Weight and atomic percentages of BiOF/ BiFeO<sub>3</sub> composite.

|                 | <b>Bismuth</b> | <b>Oxygen</b> | <b>Iron</b> | <b>Fluorine</b> |
|-----------------|----------------|---------------|-------------|-----------------|
| <b>Weight %</b> | 81.04          | 4.97          | 8.14        | 5.84            |
| <b>Atom %</b>   | 33.66          | 26.97         | 12.66       | 26.71           |

### Section III: NMR spectra

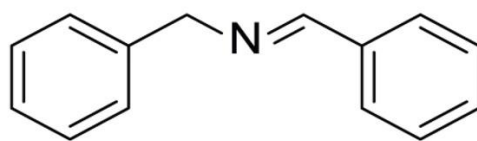

*N*-benzylidenebenzylamine

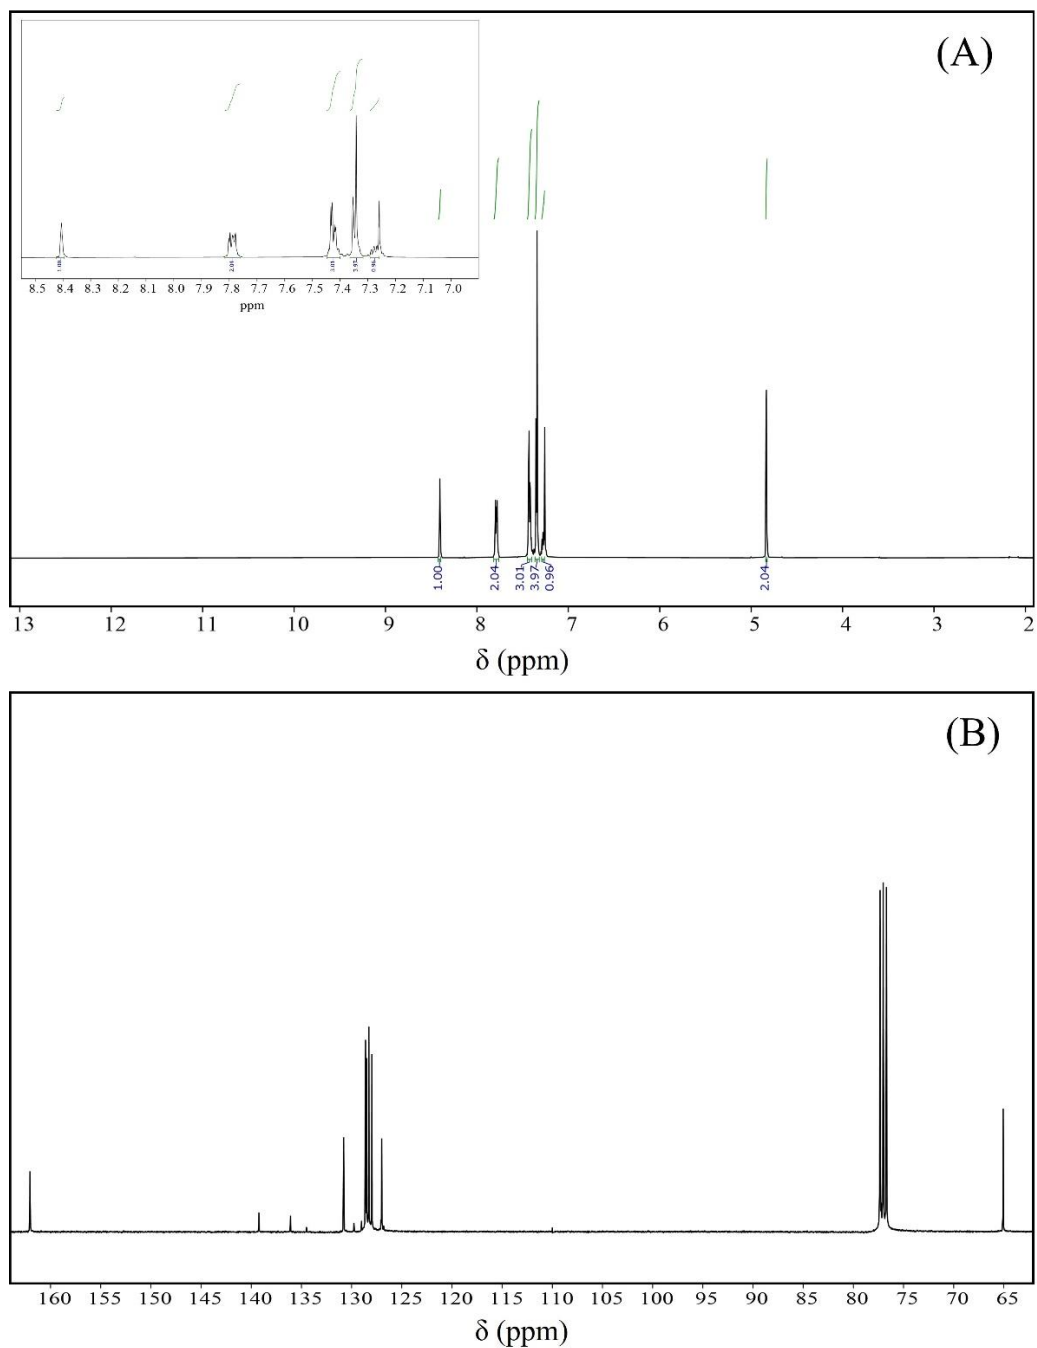

Figure S6. Spectra of *N*-benzylidenebenzylamine product using  $^1\text{H}$ -NMR (A) and  $^{13}\text{C}$ -NMR

(B).

#### Section IV: FTIR spectra

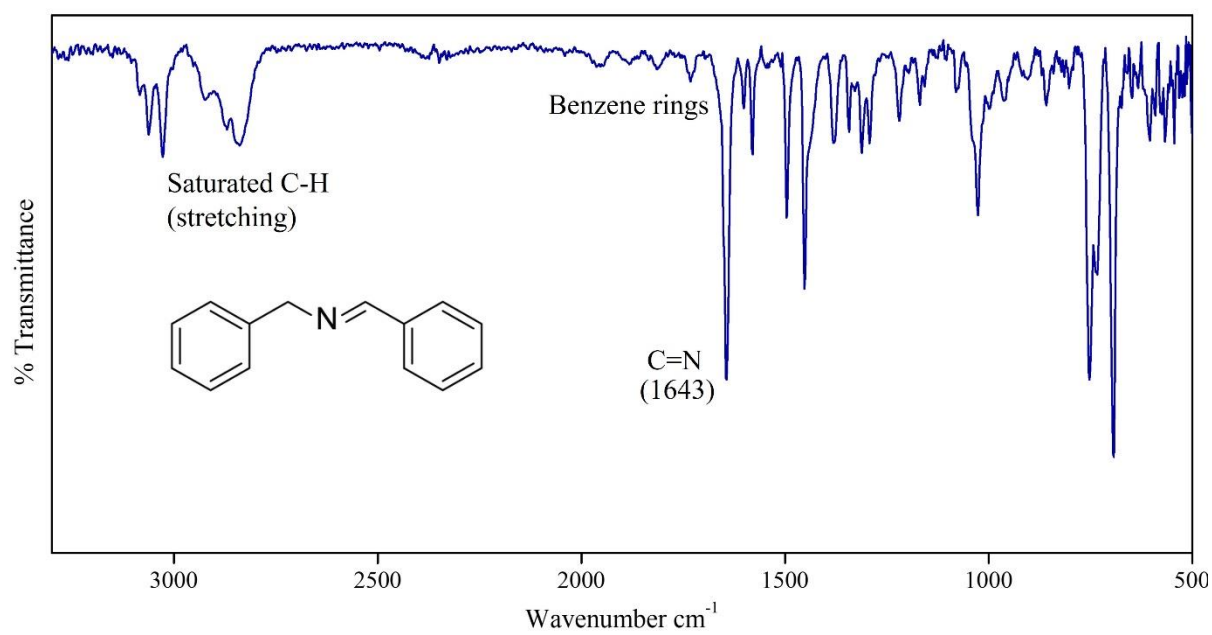

Figure S7. FTIR spectrum of *N*-benzylidenebenzylamine.
